# Supplementary material for: Pan-American Lancehead Pit-Vipers: Coagulotoxic Venom Effects and Antivenom Neutralisation of Bothrops asper and B. atrox Geographical Variants
Source: Toxins (Basel). 2021 Jan 22;13(2):78. doi: 10.3390/toxins13020078 (PMC7911261; doi:10.3390/toxins13020078)
Supplement: Supplementary file 1 [file toxins-13-00078-s001.xlsx]

## Sheet: Information about this file
This sheet details what the following tabs contain
It includes all the data for the eight-point dilution curves in Figure. 1A and Figure. 2A, the X-fold shift values in Figure. 1B and Figure. 2B, and the the X-fold shift values in Figure. 3.
Figure. 1A data
This tab has the data of the plasma clotting times (seconds) when venom and venom + antivenom is added for all B. asper samples. It is the raw data for the graphs in Figure. 1A.
Figure. 1B data
This tab has the X-fold shift values for all B. asper samples in Figure. 1B. It is the data for the graphs in Figure. 1B.
Figure. 2A data
This tab has the data of the plasma clotting times (seconds) when venom and venom + antivenom is added for all B. atrox samples. It is the data for the graphs in Figure. 2A.
Figure. 2B data
This tab has the X-fold shift values for all B. atrox samples in Figure. 2B. It is the data fro the graphs in Figure. 2B.
Figure. 3 data
This tab has the X-fold shift values for each venom with each antivenom. This is the data for the graphs in Figure. 3.

## Sheet: Figure. 1A data
									B. asper (Ecuador)
	Venom only			Antivipmyn			PoliVal-ICP			Antivipmyn Tri			BothroFav			SAB
Venom Concentration (ug/ml)	Rep 1	Rep 2	Rep 3	Rep 1	Rep 2	Rep 3	Rep 1	Rep 2	Rep 3	Rep 1	Rep 2	Rep 3	Rep 1	Rep 2	Rep 3	Rep 1	Rep 2	Rep 3
20	14.3	13.6	12.6	14.3	14.3	14.2	19.5	19.5	15.4	14.2	16.2	14.9	15.9	15.2	15.1	15.2	15.8	15
10	15.6	15.8	15.5	16.9	16.9	20.6	26.1	23.5	26.7	16.5	16.6	16.6	17.5	17.6	17.7	19.1	18.7	18.5
4	21.1	21.4	21.4	24.6	24.5	24.7	52.7	52.8	52.5	23.3	24.1	24.1	24.2	24.6	24.2	28.3	27.1	26.3
1.66	29.1	29.2	29.3	37.5	34.9	35.6	83.1	84.2	83.2	35.1	35.5	35.6	33.3	33.5	33.3	38.4	38.8	39
0.66	40.7	40.9	39.7	50.6	50.5	50.1	115.4	120	116.5	54.7	55.7	53.5	47.4	47.6	47.3	55.9	59.8	58.6
0.25	56.2	56.7	54.4	74.8	72.9	72.2	162	169.8	173.6	87.4	79.9	88.5	72.2	72.5	71.1	88.4	96.5	92.5
0.125	70.7	72.4	66.1	97.1	94.2	96.6	215.7	212.7	228.2	123.3	125.2	124.8	92.5	95.2	93.1	130.1	128.6	125.5
0.05	96.1	98.9	77.8	122.9	121.6	124.2	252	250.2	269.9	163.9	166.7	165.4	131.1	132.7	130.3	198.3	199.6	187.3
									B. asper (Costa Rica)
	Venom only			Antivipmyn			PoliVal-ICP			Antivipmyn Tri			BothroFav			SAB
Venom Concentration (ug/ml)	Rep 1	Rep 2	Rep 3	Rep 1	Rep 2	Rep 3	Rep 1	Rep 2	Rep 3	Rep 1	Rep 2	Rep 3	Rep 1	Rep 2	Rep 3	Rep 1	Rep 2	Rep 3
20	19.7	18.1	15.4	18	21	18	26.7	28.2	24.5	19.7	17.1	19.8	21.1	24.2	27	24.1	19.9	26.1
10	19.9	19.5	19.4	25.8	26	25.3	41.3	42.2	39.7	23.2	23.5	23.9	29.3	30.1	30.5	28.8	29	29
4	27.2	26.3	26.3	47.5	49	47.4	70.9	76.5	77.1	40.9	40.8	41.2	45	44.8	45.1	46.6	47.3	47.1
1.66	36.4	35.2	35.5	80.4	79.6	80.4	121.3	125.4	122.1	78.5	78.9	77.9	65.2	64.8	64.9	74.7	71.9	73.7
0.66	49.6	48.3	47.4	120.9	122.2	125.4	203.4	214.5	189.3	144.6	140	147.1	91.4	94.5	92.3	119	118.4	120.2
0.25	70	68.9	64.7	187.5	197.4	185.3	333.8	365.4	329.2	261.5	245.7	275.8	141.6	143.7	141.8	195.8	187.8	187.3
0.125	94.4	92.8	82.7	256.6	277.8	257.7	404.1	454.2	414.6	361.8	345.5	377.2	187.1	197.5	194.3	258.8	234.2	257.8
0.05	134.6	111.9	105.1	368.7	383.1	337.6	492.6	477.9	444.1	460.7	399.1	437.7	242.9	277.9	261.8	347.6	280.1	347.5
									B. asper (Mérida, Yucatán, Mexico)
	Venom only			Antivipmyn			PoliVal-ICP			Antivipmyn Tri			BothroFav			SAB
Venom Concentration (ug/ml)	Rep 1	Rep 2	Rep 3	Rep 1	Rep 2	Rep 3	Rep 1	Rep 2	Rep 3	Rep 1	Rep 2	Rep 3	Rep 1	Rep 2	Rep 3	Rep 1	Rep 2	Rep 3
20	15.1	13	14.7	13.7	13.5	15.4	14.4	15.3	15.3	15.8	15	16.4	17.4	17.6	16.8	17.6	17.1	17.2
10	15.2	15.2	15.4	17.1	17.1	17.1	18.5	22.4	21.9	16.7	21.9	16.7	18.9	19.4	18.6	18.7	18.8	18.5
4	20.4	20.4	20.6	26	26.2	26	34	44.2	41.2	24.5	24.6	24	28.7	29.1	27.9	28	28.5	28.4
1.66	27.9	27.1	28.2	44	54.7	44.1	79	76.7	78.3	38.9	39.2	38.7	41.4	42.4	41.8	43.7	43.1	43.2
0.66	37.7	37.4	38.3	82	72.3	81.8	121.9	142.2	131.1	72.2	66.9	72.2	63.5	63.2	59.9	71.7	69.3	68.8
0.25	56.4	52.4	56.5	130.3	118.1	134.4	202	205	212.1	128.9	123.9	130.3	97.5	98.8	94.2	113.8	111.4	114.9
0.125	75.2	64.9	74.8	179.3	159.9	174.9	271.1	272.5	272.9	183.1	175.5	177	135.2	138.6	128.4	159.4	154.7	161
0.05	104.7	79.6	107.5	222.8	213	247.4	331.8	307.4	278.2	243.8	236.9	246.5	183.9	187.8	177.2	219.3	220	220.4
									B. asper (San Andres, Tuxtla, Veracruz, Mexico)
	Venom only			Antivipmyn			PoliVal-ICP			Antivipmyn Tri			BothroFav			SAB
Venom Concentration (ug/ml)	Rep 1	Rep 2	Rep 3	Rep 1	Rep 2	Rep 3	Rep 1	Rep 2	Rep 3	Rep 1	Rep 2	Rep 3	Rep 1	Rep 2	Rep 3	Rep 1	Rep 2	Rep 3
20	44.9	48.8	47.9	61.2	56.5	54.4	67.6	58.1	78.8	50	57.9	50.6	126.4	122.2	129.7	74.3	63.7	62.9
10	59.2	58.6	58.1	81.6	82.8	84.4	96.6	113.8	115	78	75.5	76.9	166.3	166.5	168.5	110.5	111.5	116.6
4	72.1	73.3	73.3	111.5	116.4	111.5	167.5	194.2	166	127.9	128.8	129.6	207.4	207.3	204.2	234.4	243.5	240.4
1.66	90.8	89	89.9	157.2	158.7	152.4	274.3	312.6	312.6	196.1	202.6	189.2	272.7	272.6	264.7	519.5	478.5	444.2
0.66	114.2	114.9	164.5	236.4	241.8	228.6	418.7	418.4	451	292.5	343.7	339	389.3	381.5	367.3	561.9	500.7	529.6
0.25	160.8	166.1	168.1	381.1	364.1	322.6	524.8	499.5	506.2	489.9	473.4	463.4	508.6	493.3	446.5	532.3	571.9	503.7
0.125	200.8	222.3	218.8	455.2	461.1	422.3	496.3	488.2	500.8	465.6	527.7	522.6	503	567.2	513.3	551.3	511.2	531.8
0.05	205.5	298.2	305.1	494.5	524.2	482.9	531.9	532.6	499.6	433.7	542.5	565.1	549.3	591.9	519.3	525.1	545.5	551.9

## Sheet: Figure. 1B data
				B. asper (Ecuador)
		Antivipmyn	PoliVal-ICP	Antivipmyn Tri	BothroFav	SAB
	Rep 1	0.140976	1.11851	0.134005	0.143558	0.27653
	Rep 2	0.125968	1.08312	0.169334	0.143005	0.276975
	Rep 3	0.2386	1.1474	0.185843	0.16702	0.281548
				B. asper (Costa Rica)
		Antivipmyn	PoliVal-ICP	Antivipmyn Tri	BothroFav	SAB
	Rep 1	0.606879	1.5075	0.621876	0.532893	0.690062
	Rep 2	0.728842	1.74277	0.641298	0.64712	0.69765
	Rep 3	0.725275	1.68261	0.774833	0.740358	0.843568
				B. asper (Mérida, Yucatán, Mexico)
		Antivipmyn	PoliVal-ICP	Antivipmyn Tri	BothroFav	SAB
	Rep 1	0.325478	0.762765	0.289866	0.357162	0.394344
	Rep 2	0.39422	1.07743	0.431298	0.437296	0.442475
	Rep 3	0.346987	0.933472	0.286199	0.319854	0.378033
				B. asper (San Andres, Tuxtla, Veracruz, Mexico)
		Antivipmyn	PoliVal-ICP	Antivipmyn Tri	BothroFav	SAB
	Rep 1	0.550691	1.12903	0.639785	1.89094	1.85253
	Rep 2	0.530166	1.28507	0.667421	1.82278	1.71719
	Rep 3	0.457903	1.25258	0.596012	1.87962	1.63959

## Sheet: Figure. 2A data
									B. atrox (French Guiana)
	Venom only			Antivipmyn			PoliVal-ICP			Antivipmyn Tri			BothroFav			SAB
Venom Concentration (ug/ml)	Rep 1	Rep 2	Rep 3	Rep 1	Rep 2	Rep 3	Rep 1	Rep 2	Rep 3	Rep 1	Rep 2	Rep 3	Rep 1	Rep 2	Rep 3	Rep 1	Rep 2	Rep 3
20	27.9	26.4	26.1	30.4	30.4	30.5	33.1	32.5	32.2	29.8	30.3	29.8	49.6	51.3	50.9	40.3	36.7	40
10	30.4	29.9	29.1	33.9	35.4	34.1	38.2	38	37.9	34.5	34	33.7	71.3	70.6	70.5	61	58.4	58.1
4	37	36.3	35.2	43.5	44.1	44	48.3	48.5	48.6	45	44.1	43.6	107.9	108.1	106.9	135.9	129.9	124.1
1.66	45	43.5	43.6	54.9	56.3	55.1	63.6	63.1	62.5	57.8	59.7	58.4	154.3	158.4	156.7	252.4	234.5	256.2
0.66	55.8	55.2	54	72.3	75.3	75.4	89.2	89.2	88.3	84.5	83.7	83.8	226.9	230.8	239.7	376.7	378.7	396.5
0.25	74.9	74.8	73	105.6	109.9	107.2	134.4	134.6	138.9	133.8	133.4	134.6	336.9	349.4	351.4	474.7	454.2	472.8
0.125	97.8	93.3	92.9	144.2	145.3	143.8	186.8	190.6	184.6	186.7	184	191.7	413.6	403.6	436.1	484	502.5	505.8
0.05	129.6	127.6	127.8	206.4	207.4	198.9	258.4	260.5	255.8	250.5	247.2	295.2	479.7	472.4	492.5	511.5	494.9	506.2
									B. atrox (Alto Marañon,Peru)
	Venom only			Antivipmyn			PoliVal-ICP			Antivipmyn Tri			BothroFav			SAB
Venom Concentration (ug/ml)	Rep 1	Rep 2	Rep 3	Rep 1	Rep 2	Rep 3	Rep 1	Rep 2	Rep 3	Rep 1	Rep 2	Rep 3	Rep 1	Rep 2	Rep 3	Rep 1	Rep 2	Rep 3
20	28.2	29	27.7	35.2	33.9	34.6	45	42.9	44.6	34.8	34.4	34.2	66.8	66.8	66.3	64.3	60	66.8
10	32.7	32.6	32.3	41.2	41.3	40.8	52.7	51.8	52.4	43.9	42.4	43.6	87.2	90.6	95.1	92.8	96.2	97.5
4	40.6	40.6	40.4	53	52.9	52.8	68.7	68.3	69.7	60.9	58.1	58.3	125.7	133.6	134.5	181	178.3	178.5
1.66	50.5	50.1	50.7	69.2	68.9	67.7	95.8	95.9	95.5	84.4	85.4	81.6	192.4	198	197.8	309.7	306.2	314.7
0.66	65.6	65.6	66	96.7	95.6	93.5	138.8	137.9	142.3	130.7	129.4	126.7	280.2	287	287.7	405.7	403.9	402.6
0.25	89.2	92.6	88.9	141.9	141.9	136.4	212.5	197.6	224.4	203.8	201.5	212.5	391.5	402.7	385.3	466.5	443.3	444.7
0.125	109	116	108.8	187.9	178.5	178.9	291.2	283.5	286.7	281.9	259.8	266	393.6	439.8	449.1	470.2	478.9	466.9
0.05	133.7	146.8	128	248.4	224	238.5	364.9	324.8	339	360	331.3	341.5	425	454	443.8	444.5	451.9	503.5

## Sheet: Figure. 2B data
				B. atrox (French Guiana)
		Antivipmyn	PoliVal-ICP	Antivipmyn Tri	BothroFav	SAB
	Rep 1	0.162489	0.320169	0.213349	1.67415	2.11571
	Rep 2	0.223852	0.349394	0.241209	1.76971	2.05402
	Rep 3	0.228995	0.372899	0.257715	1.82768	2.18668
				B. atrox (Alto Marañon,Peru)
		Antivipmyn	PoliVal-ICP	Antivipmyn Tri	BothroFav	SAB
	Rep 1	0.315371	0.739189	0.492658	2.01091	2.78553
	Rep 2	0.294952	0.692328	0.445977	2.10349	2.73946
	Rep 3	0.306929	0.758152	0.474185	2.19429	2.875

## Sheet: Figure. 3 data
				Antivipmyn
		B. asper (Costa Rica)	B. asper (Ecuador)	B. asper (Mérida, Yucatán, Mexico)	B. asper (San Andres, Tuxtla, Veracruz, Mexico)	B. atrox (French Guiana)	B. atrox (Alto Marañon,Peru)
	Rep 1	0.606879	0.140976	0.325478	0.550691	0.162489	0.315371
	Rep 2	0.728842	0.125968	0.39422	0.530166	0.223852	0.294952
	Rep 3	0.725275	0.2386	0.346987	0.457903	0.228995	0.306929
				Antivipmyn Tri
		B. asper (Costa Rica)	B. asper (Ecuador)	B. asper (Mérida, Yucatán, Mexico)	B. asper (San Andres, Tuxtla, Veracruz, Mexico)	B. atrox (French Guiana)	B. atrox (Alto Marañon, Peru)
	Rep 1	0.621876	0.134005	0.289866	0.639785	0.213349	0.492658
	Rep 2	0.641298	0.169334	0.431298	0.667421	0.241209	0.445977
	Rep 3	0.774833	0.185843	0.286199	0.596012	0.257715	0.474185
				PoliVal-ICP
		B. asper (Costa Rica)	B. asper (Ecuador)	B. asper (Mérida, Yucatán, Mexico)	B. asper (San Andres, Tuxtla, Veracruz, Mexico)	B. atrox (French Guiana)	B. atrox (Alto Marañon, Peru)
	Rep 1	1.5075	1.11851	0.762765	1.12903	0.320169	0.739189
	Rep 2	1.74277	1.08312	1.07743	1.28507	0.349394	0.692328
	Rep 3	1.68261	1.1474	0.933472	1.25258	0.372899	0.758152
				BothroFav
		B. asper (Costa Rica)	B. asper (Ecuador)	B. asper (Mérida, Yucatán, Mexico)	B. asper (San Andres, Tuxtla, Veracruz, Mexico)	B. atrox (French Guiana)	B. atrox (Alto Marañon, Peru)
	Rep 1	0.532893	0.143558	0.357162	1.89094	1.67415	2.01091
	Rep 2	0.64712	0.143005	0.437296	1.82278	1.76971	2.10349
	Rep 3	0.740358	0.16702	0.319854	1.76145	1.82768	2.19429
				SAB
		B. asper (Costa Rica)	B. asper (Ecuador)	B. asper (Mérida, Yucatán, Mexico)	B. asper (San Andres, Tuxtla, Veracruz, Mexico)	B. atrox (French Guiana)	B. atrox (Alto Marañon,Peru)
	Rep 1	0.690062	0.27653	0.394344	1.85253	2.11571	2.78553
	Rep 2	0.69765	0.276975	0.442475	1.71719	2.05402	2.73946
	Rep 3	0.843568	0.281548	0.378033	1.63959	2.18668	2.875
